# Supplementary material for: Role of caveolin-1 as a biomarker for radiation resistance and tumor aggression in lung cancer
Source: PubMed Central journal article supplement (PMC8584669; doi:10.1371/journal.pone.0258951), 2021-11-11

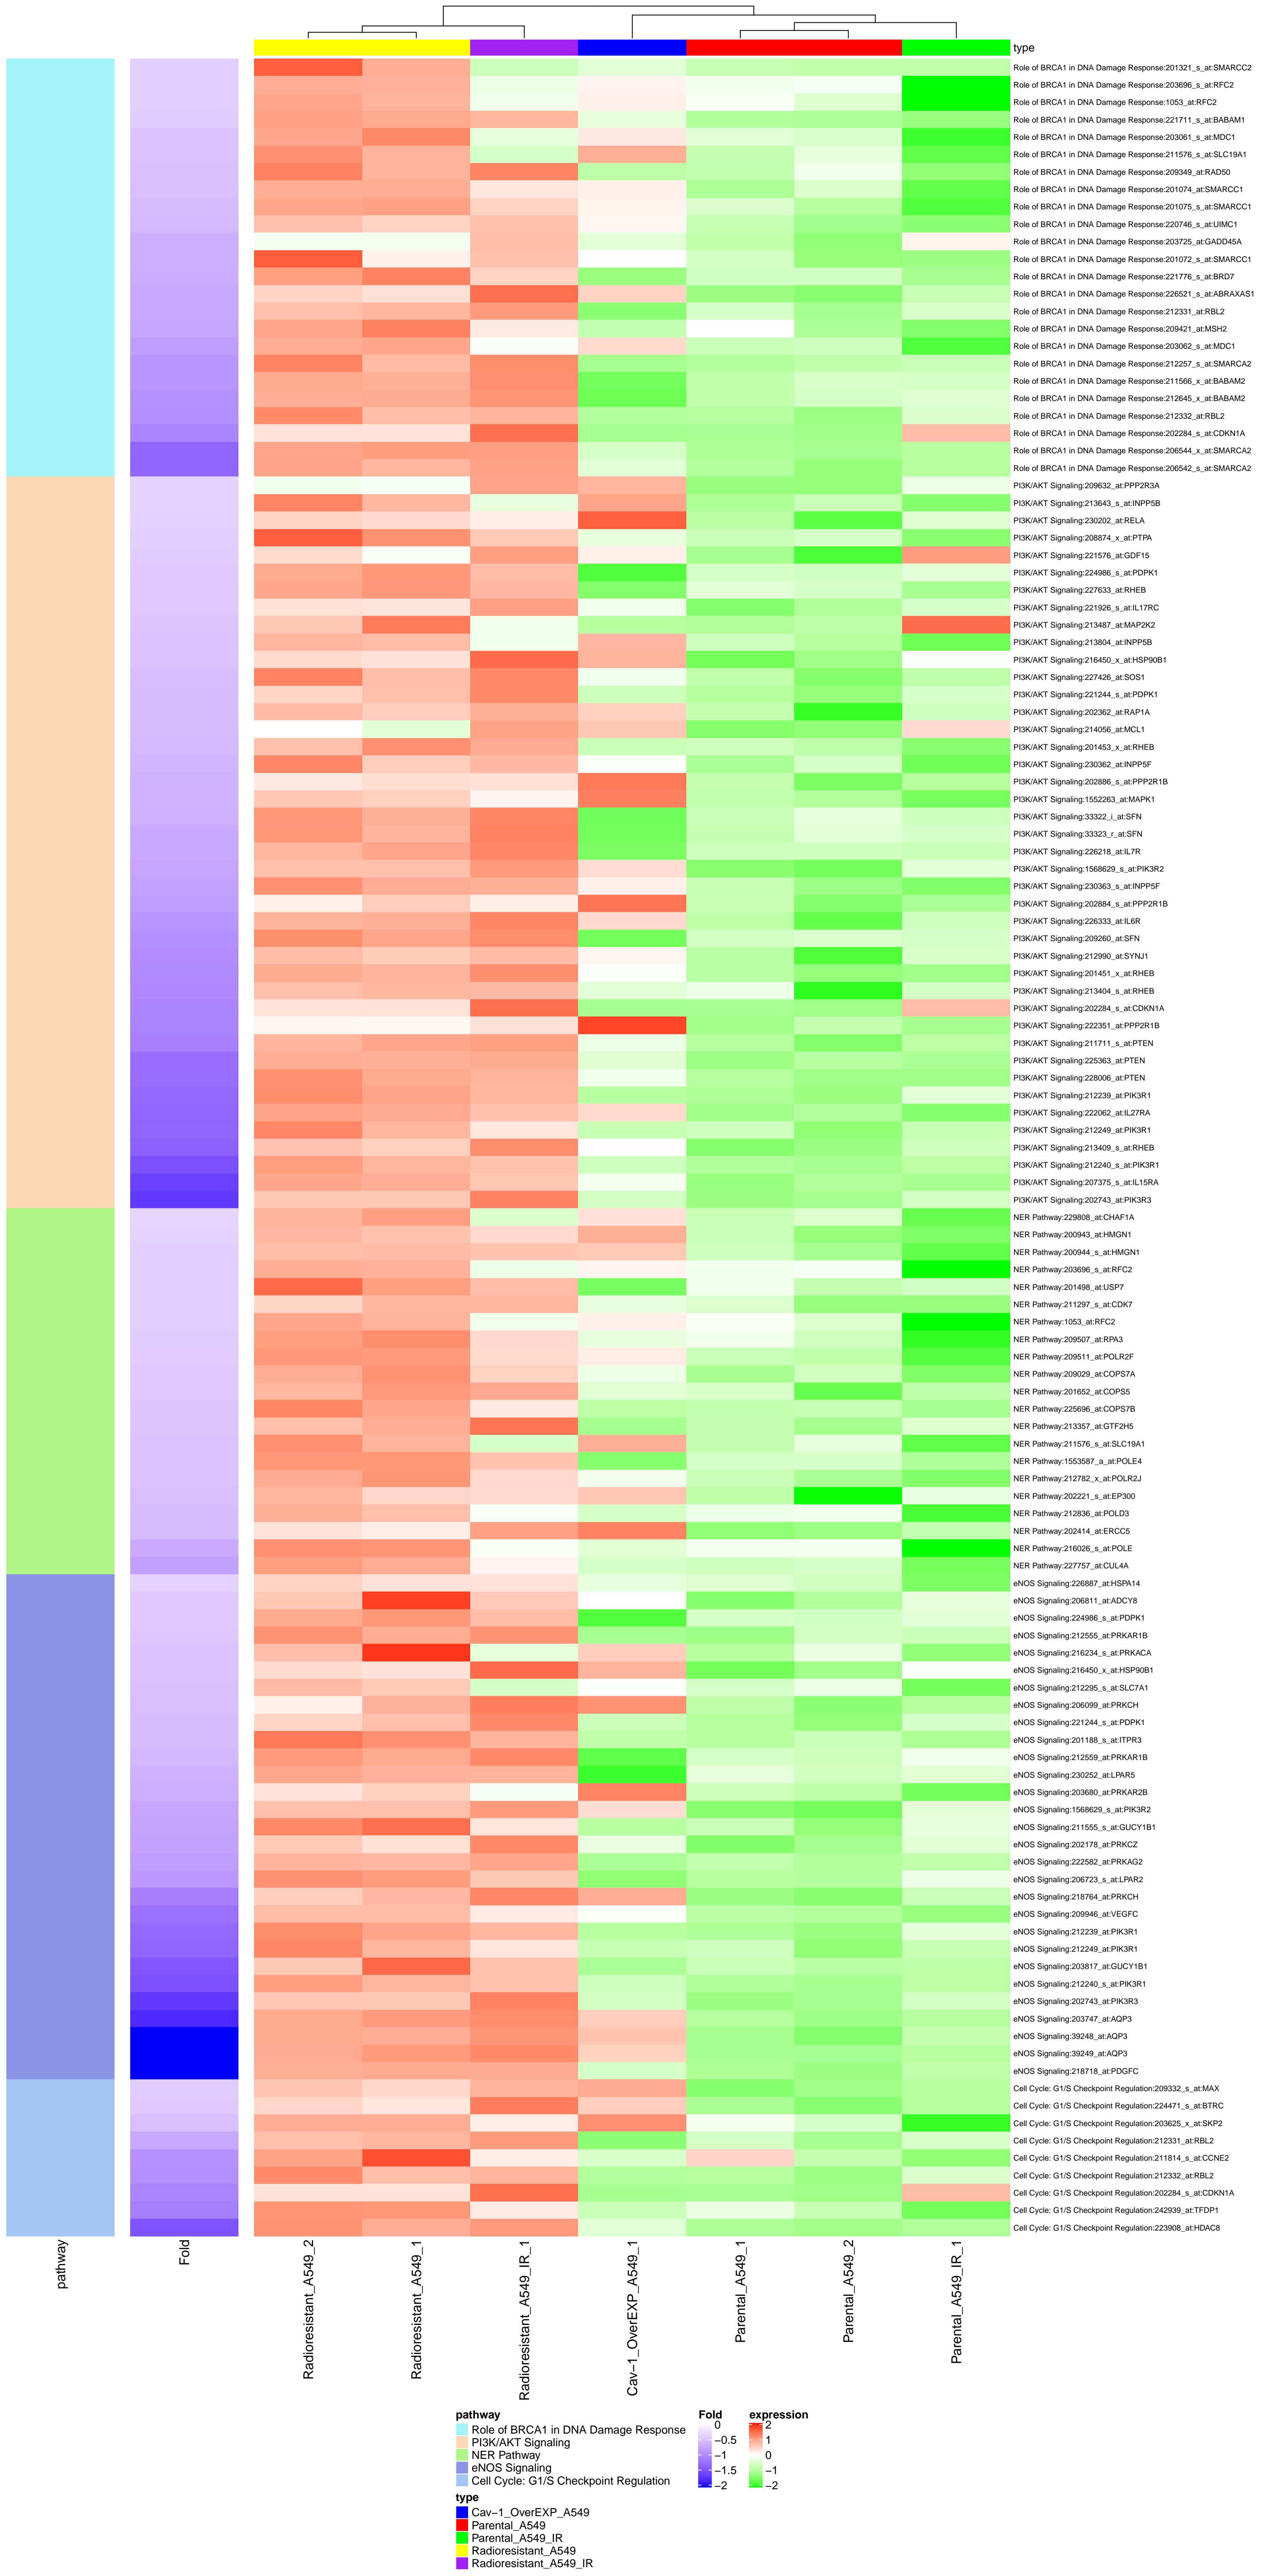

Supplement: pone.0258951.s001.pdf [file pone.0258951.s001.pdf]
